# Supplementary material for: Effect of patient decision aids on choice between sugammadex and neostigmine in surgeries under general anesthesia: a multicenter randomized controlled trial
Source: PubMed Central journal article supplement — Korean J Anesthesiol. 2022 Dec 5;76(4):280–9. doi: 10.4097/kja.22624 (PMC10391073; doi:10.4097/kja.22624), 2022-12-05
Supplement: kja-22624-appendix2.pdf [file kja-22624-appendix2.pdf]

## Appendix 2. Patient decision aids (Traditional Chinese version).

2019/08/22(v.1)

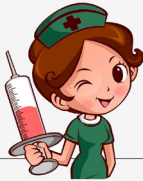

## 全身麻醉後，我該使用何種肌肉鬆弛劑的解藥？

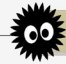

## 麻醉手術的過程

手術執行全身麻醉時，麻醉醫師會使用肌肉鬆弛劑，可於短時間內麻痺病人全身的肌肉，以利於術前的插管，幫助手術的進行。手術結束後，病人在恢復的過程中會有肌肉張力恢復不全之現象，麻醉醫師會在適當的時機投予肌肉鬆弛劑的拮抗劑，以幫助病人回復肌力。

YA! 佔據位子  
就不能動了

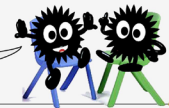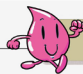

## 傳統肌肉鬆弛逆轉劑

全身麻醉後使用的傳統肌肉鬆弛逆轉劑，是用來促進病人全身肌肉張力恢復，但恢復時間較慢，且使用後仍可能會有肌肉鬆弛劑之殘存，造成延遲拔管及其相關併發症，有些病患還會出現如嘔吐、頭痛、視力模糊、腹部痙攣、心跳減緩，甚至心跳停止等副作用。

快去把位子搶回來!

可惡! 時間到了

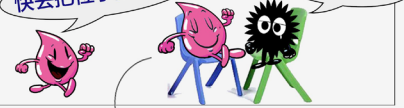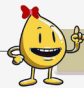

## 新型肌肉鬆弛逆轉劑Sugammadex是什麼？

肌肉鬆弛逆轉劑Sugammadex是近年來用於全身麻醉重要的新藥，用於拮抗神經肌肉阻斷劑。此拮抗劑可以直接中和體內的肌肉鬆弛劑藥物分子，在短時間之內迅速的恢復肌肉張力，不需擔心高劑量神經肌肉阻斷劑因代謝不完全所造成的無力現象，可以更安全更快速的恢復。

別想佔位子

抓到了吧!

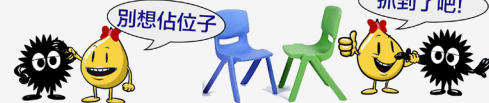

衛生福利部雙和醫院麻醉科

## 比較表

| 傳統(Neostigmine)      | 機轉           | 新型(Sugammadex)                |
|----------------------|--------------|-------------------------------|
| 增加神經肌肉間隙的傳導物質，刺激肌肉收縮 | 機轉           | 直接與肌肉鬆弛劑藥物分子結合，阻斷其效用          |
| 慢 (7.5-10.8分鐘)       | 恢復90%肌力所需時間  | 快 (1.6-2.2分鐘)                 |
| 高                    | 肌肉鬆弛劑殘留效應    | 極低                            |
| 高                    | 發生呼吸系統併發症機率  | 低                             |
| 較常見                  | 心跳減慢或血壓下降之風險 | 幾乎無                           |
| 高                    | 手術後噁心嘔吐      | 低                             |
| 高                    | 手術後口乾舌燥      | 低                             |
| 頭痛、尿滯留、視力模糊、腹瀉       | 其他副作用        | 味覺障礙、口服避孕藥失效、頭痛               |
| 末期腎臟病                | 高度建議使用之手術與狀況 | 高齡者、肥胖、腹腔內視鏡、進行精細部位手術(腦、眼、脊椎) |
| 無                    | 使用限制         | 末期腎臟病                         |
| 健保給付                 | 費用           | 自費(6000-9000元)                |

請透過下列問題來幫助您確定您的選擇

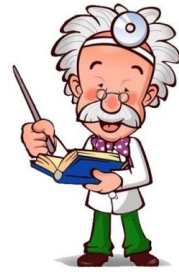

A. 現在您對藥物認知有多少?

- 新型藥物 Sugammadex 可以較快且完全的回復肌肉功能? 是 否 不清楚
- 舊型藥物 Neostigmine 對於心臟血管系統影響較大? 是 否 不清楚
- 新型藥物 Sugammadex 有較少的副作用產生? 是 否 不清楚

B. 您選擇治療最在意的因素?

下列考量項目請依據您個人的重視程度來勾選 (5 分為最重視 · 1 分為最不重視)

|           | 5 | 4 | 3 | 2 | 1 |
|-----------|---|---|---|---|---|
| 復原時間長短    |   |   |   |   |   |
| 肌肉鬆弛劑殘留機會 |   |   |   |   |   |
| 心臟血管副作用   |   |   |   |   |   |
| 經濟考量      |   |   |   |   |   |

C. 您的決策是否有足夠的支持?

- 我需要和我的家人充份討論 是 否
- 我需要確認我的醫療保險有給付我的自費藥品 是 否
- 在與本院的醫療人員會談後，我已得到足夠的資訊來做決定 是 否

D. 您的選擇

依目前您的考量，您比較傾向選擇的麻醉甦醒藥品為

- 使用新型藥物 Sugammadex
- 使用傳統藥物 Neostigmine
- 還無法決定，需要再和醫師討論

E. 參考文獻

- The comparative efficacy and safety of sugammadex and neostigmine in reversing neuromuscular blockade in adults. A Cochrane systematic review with meta-analysis and trial sequential analysis. *Anaesthesia* 2018, 73: 631-41.
- Efficacy and safety of sugammadex versus neostigmine in reversing neuromuscular blockade in adults. *Cochrane Database of Systematic Reviews* 2017, Issue 8. Art. No.: CD012763.
